# Supplementary figures and images for: Kinematics of swimming of the manta ray: three-dimensional analysis of open water maneuverability
Source: Oxford University Press journal article supplement (doi:10.1242/jeb.166041), 2018-01-01

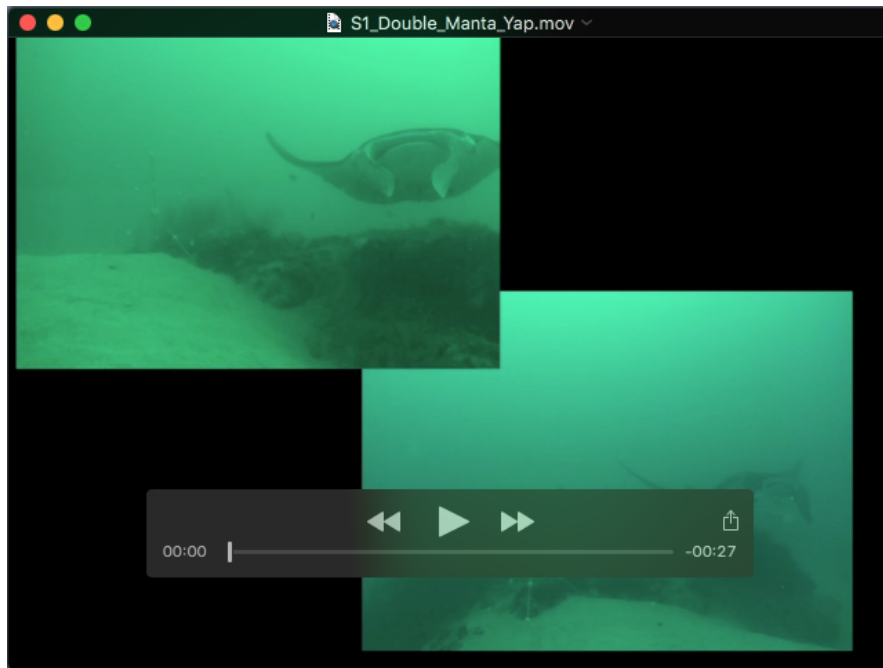

**Movie S1**

Supplement: jeb166041supp.pdf [file jeb166041supp.pdf]
